# Supplementary material
Source: Springer Nature journal article supplement (https://www.springermedizin.de/resource/supplementary/12865_2009_256_MOESM1_ESM.pdf/9427612)
Supplement: MOESM1 [file 9427612]

**Cytokine expression OE21 cells alone**

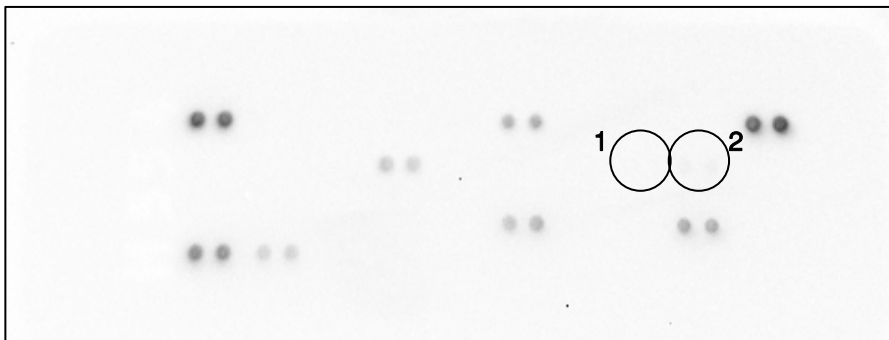

**1 IL-6**

**2 IL-8**

**Cytokine expression OE21 cells + PMN**

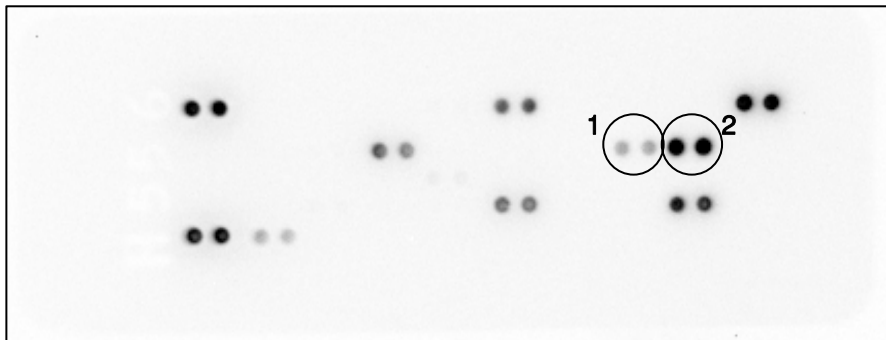

**1 IL-6**

**2 IL-8**
